# Supplementary material
Source: Springer Nature journal article supplement (https://www.springermedizin.de/resource/supplementary/12889_2010_2333_MOESM2_ESM.pdf/9485422)

Population  
Percentage

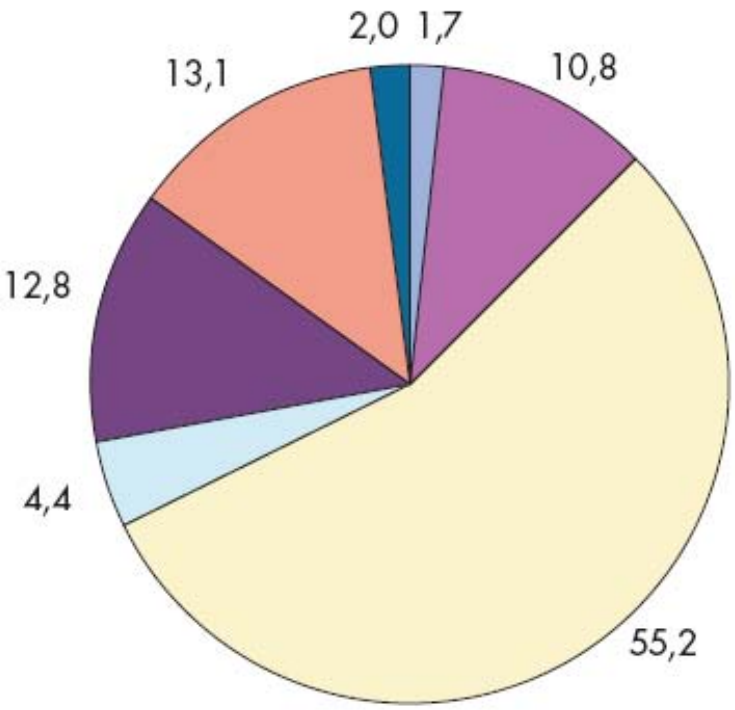

Increase of life expectancy  
in years

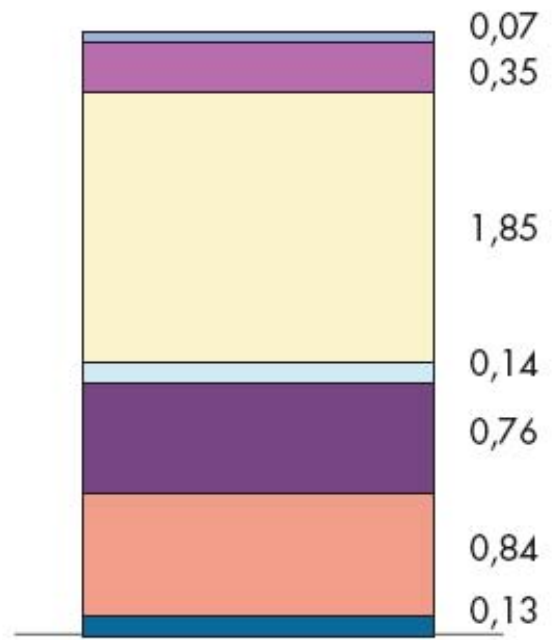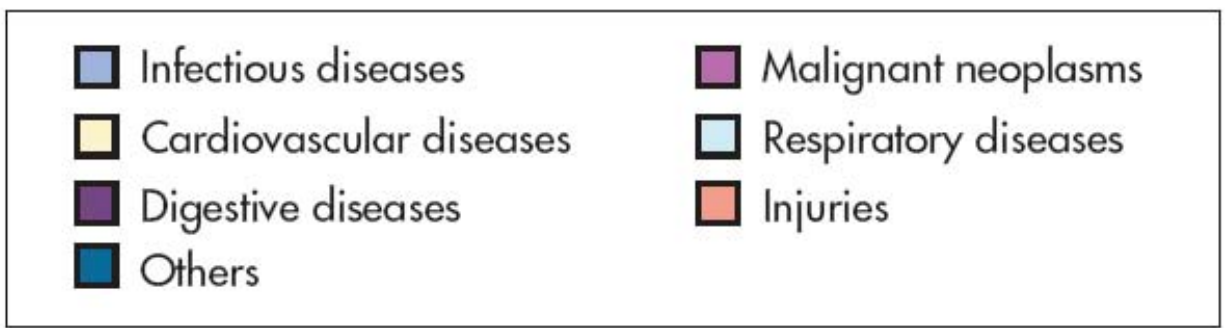

Supplement: MOESM2 [file 9485422]
